# Supplementary material for: Facile Preparation of Magnetic COF-on-COF for Rapid Adsorption and Determination of Sulforaphane from Cruciferous Vegetables
Source: MDPI journal article supplement (doi:10.3390/foods13030409), 2024-01-26
Supplement: s1 [file s1]

# **Supplementary Information**

## **for**

### **Facile preparation of magnetic COF-on-COF for rapid adsorption and determination of sulforaphane from cruciferous vegetables**

Jie Zhou <sup>1,†</sup>, Dan Xu <sup>2,†</sup>, Jiayong Cao <sup>3</sup>, Weiye Shi <sup>4</sup>, Xuan Zhang <sup>3</sup>, Huan Lin <sup>1</sup>, Chen Yin <sup>3</sup>, Lingyun Li <sup>1</sup>, Donghui Xu <sup>1</sup> and Guangyang Liu <sup>1,\*</sup>

1 State Key Laboratory of Vegetable Biobreeding, Institute of Vegetables and Flowers, Chinese Academy of Agricultural Sciences, Key Laboratory of Vegetables Quality and Safety Control, Ministry of Agriculture and Rural Affairs of China, Beijing 100081, China; [linhuan03@caas.cn](mailto:linhuan03@caas.cn) (H.L.); [xudonghui@caas.cn](mailto:xudonghui@caas.cn) (D.X.)

2 College of Life Sciences, Yantai University, Yantai 264005, China

3 Hebei Key Laboratory of Quality and Safety Analysis-Testing for Agro-Products and Food, Hebei North University, Zhangjiakou 075000, China

4 Institute of Biological Science and Engineering, Hebei University of Science and Technology, Shijiazhuang 050018, China

\* Correspondence: [liuguangyang@caas.cn](mailto:liuguangyang@caas.cn)

† These authors contributed equally to this work.

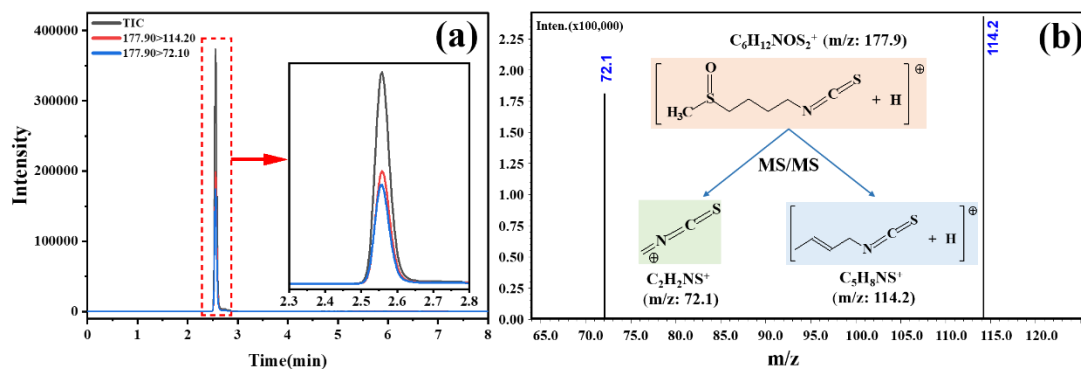

**Figure S1.** The ion chromatogram (a) and mass spectrum (b) of SFN in MeOH (0.01 mg/L)

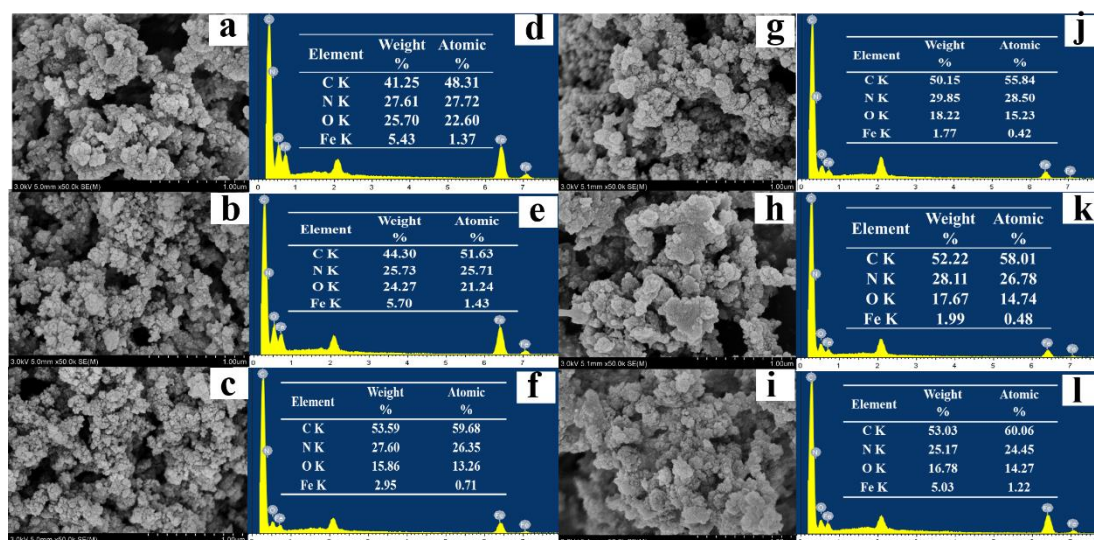

**Figure S2.** SEM (a-c, g-i) and EDS (d-f, j-l) results of Fe<sub>3</sub>O<sub>4</sub>@COFs-1 and MB-COFs (1-5), respectively.

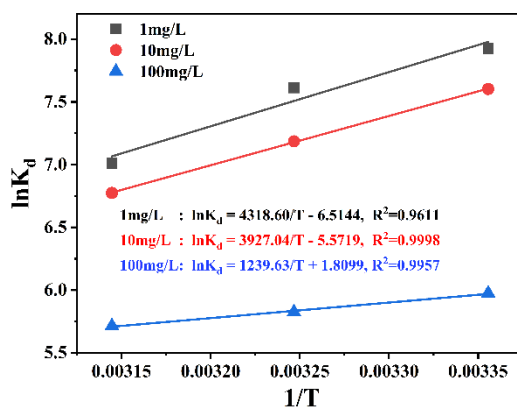

**Figure S3.** Vant Hoff's thermodynamic plot for adsorption of SFN.

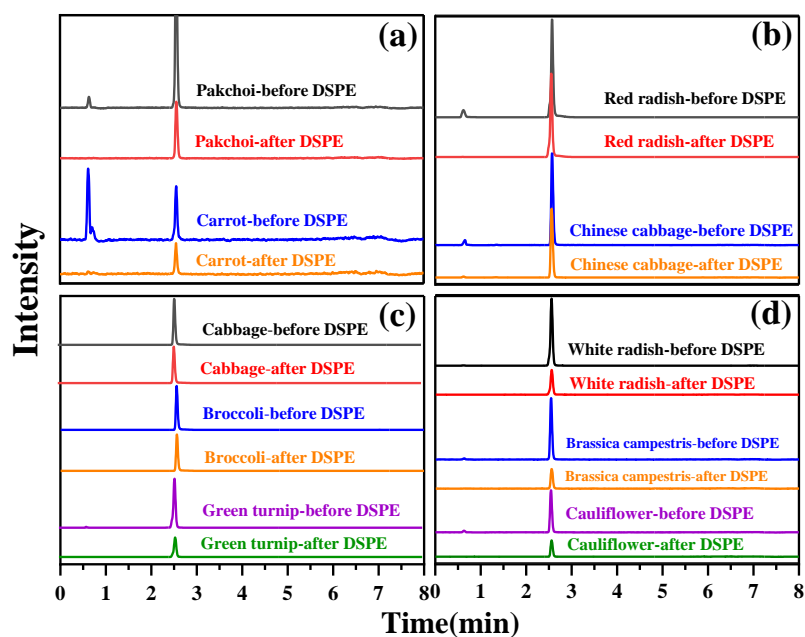

**Figure S4.** Extracted ion chromatograms of SFN in real cruciferous vegetable samples before and after MSPE. Pakchoi and carrot (a), red radish and Chinese cabbage (b), cabbage, broccoli and green turnip (c), and white radish, Brassica campestris, and cauliflower (d).

**Table S1** The molecular information, ESI and MS/MS parameters of SFN.

| Parameters                  | Information / Value                                                                  |      |
|-----------------------------|--------------------------------------------------------------------------------------|------|
| Molecular information       |                                                                                      |      |
| CAS number                  | 4478-93-7                                                                            |      |
| Molecular formula           | C <sub>6</sub> H <sub>11</sub> NOS <sub>2</sub>                                      |      |
| Molecular weight (g/mol)    | 177.3                                                                                |      |
| Chemical structure          | 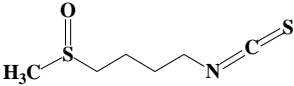 |      |
| ESI parameters              |                                                                                      |      |
| Interface voltage (V)       | 3000                                                                                 |      |
| Interface temperature (°C)  | 300                                                                                  |      |
| DL temperature (°C)         | 250                                                                                  |      |
| Heat block temperature (°C) | 400                                                                                  |      |
| Nebulizing gas flow (L/min) | 3                                                                                    |      |
| Heating gas flow (L/min)    | 10                                                                                   |      |
| Driving gas flow (L/min)    | 10                                                                                   |      |
| MS/MS parameters            |                                                                                      |      |
| Retention time (min)        | 2.52                                                                                 |      |
| Precursor (m/z)             | 177.9                                                                                |      |
| Product (m/z)               | 114.2*                                                                               | 72.1 |
| Dwell time (ms)             | 100                                                                                  | 100  |

|                      |     |     |
|----------------------|-----|-----|
| Q1 Pre Bias (V)      | -13 | -13 |
| Collision energy (V) | -12 | -27 |
| Q3 Pre Bias (V)      | -21 | -29 |

\*Quantification ion.

**Table S2** MB-COFs with different amounts of ligands and their adsorption efficiency for SFN with different concentrations (mg/L)

| Serial No. | Adsorbents                             | Fe <sub>3</sub> O <sub>4</sub> @COFs-1 (g) | TAPB (g) | MPA (g) | Adsorption efficiency (%) |            |            |
|------------|----------------------------------------|--------------------------------------------|----------|---------|---------------------------|------------|------------|
|            |                                        |                                            |          |         | 0.5 mg/L                  | 5 mg/L     | 50 mg/L    |
| 1          | Fe <sub>3</sub> O <sub>4</sub> @COFs-1 | 0.5                                        | 0        | 0       | 86.87±0.34                | 83.94±0.34 | 83.06±0.11 |
| 2          | MB-COFs-1                              | 0.5                                        | 0.159    | 0.09    | 94.15±0.38                | 89.14±0.20 | 88.15±0.11 |
| 3          | MB-COFs-2                              | 0.5                                        | 0.2835   | 0.135   | 95.46±0.02                | 90.71±0.03 | 90.14±0.06 |
| 4          | MB-COFs-3                              | 0.5                                        | 0.318    | 0.18    | 95.49±0.14                | 91.42±0.10 | 90.63±0.12 |
| 5          | MB-COFs-4                              | 0.5                                        | 0.477    | 0.27    | 97.33±0.06                | 93.20±0.02 | 92.50±0.22 |
| 6          | MB-COFs-5                              | 0.5                                        | 0.636    | 0.36    | 97.28±0.02                | 93.22±0.08 | 92.37±0.06 |
| 7          | COFs-1                                 | /                                          | /        | /       | 79.69±1.23                | 63.08±8.75 | 55.01±0.54 |
| 8          | COFs-2                                 | 0                                          | 0.477    | 0.27    | 35.00±2.17                | 21.15±1.22 | 31.52±0.71 |

**Table S3** Surface area, pore volume and size of prepared samples

| Samples                                | Surface Area (S <sub>BET</sub> , m <sup>2</sup> /g) | Pore Volume (V <sub>total</sub> , cm <sup>3</sup> /g) | BJH Pore Size (nm) |
|----------------------------------------|-----------------------------------------------------|-------------------------------------------------------|--------------------|
| MB-COFs-4                              | 40.5068                                             | 0.181975                                              | 16.5031            |
| Fe <sub>3</sub> O <sub>4</sub> @COFs-1 | 61.6782                                             | 0.270135                                              | 15.231             |
| COFs-1                                 | 63.5683                                             | 0.277305                                              | 19.6184            |
| COFs-2                                 | 67.2413                                             | 0.311663                                              | 17.6443            |

**Table S4** Parameters of kinetic models for SFN adsorption by MB-COFs-4.

| Parameter of kinetic models                            | Values |
|--------------------------------------------------------|--------|
| Q <sub>e, exp</sub> (mg/g)                             | 11.804 |
| <b>Pseudo-first order</b>                              |        |
| Q <sub>e</sub> (mg/g)                                  | 2.457  |
| k <sub>1</sub> (min <sup>-1</sup> )                    | 0.0251 |
| R <sup>2</sup>                                         | 0.7905 |
| <b>Pseudo-second-order</b>                             |        |
| Q <sub>e</sub> (mg/g)                                  | 11.501 |
| k <sub>2</sub> (g mg <sup>-1</sup> min <sup>-1</sup> ) | 0.1067 |
| R <sup>2</sup>                                         | 0.9997 |
| <b>Ritchie-second-order</b>                            |        |
| Q <sub>e</sub> (mg/g)                                  | 10.890 |
| k <sub>r</sub> (min <sup>-1</sup> )                    | 3.707  |
| R <sup>2</sup>                                         | 0.9202 |
| <b>Intra-particle diffusion</b>                        |        |

|                                                    |         |
|----------------------------------------------------|---------|
| $k_{i1}$ (mg g <sup>-1</sup> min <sup>-0.5</sup> ) | 2.166   |
| $C_1$ (mg/g)                                       | 5.876   |
| $R_1^2$                                            | 0.9987  |
| $k_{i2}$ (mg g <sup>-1</sup> min <sup>-0.5</sup> ) | 0.345   |
| $C_2$ (mg/g)                                       | 9.091   |
| $R_2^2$                                            | 0.9802  |
| $k_{i3}$ (mg g <sup>-1</sup> min <sup>-0.5</sup> ) | 0.1665  |
| $C_3$ (mg/g)                                       | 9.974   |
| $R_3^2$                                            | 0.9950  |
| <b>Liquid-film diffusion</b>                       |         |
| $k_j$ (min <sup>-1</sup> )                         | 0.0251  |
| $A$ (mg/g)                                         | -1.570  |
| $R^2$                                              | 0.7905  |
| <b>Elovich model</b>                               |         |
| $\alpha$ (mg·g <sup>-1</sup> ·min <sup>-1</sup> )  | 713.46  |
| $\beta$ (g mg <sup>-1</sup> )                      | 1.333   |
| $R^2$                                              | 0.9121  |
| <b>Frusawa and Smith (F&amp;S) model</b>           |         |
| $\beta_1 S$                                        | 0.00264 |
| $R^2$                                              | 0.5790  |
| <b>Mathews and Weber (M&amp;W) model</b>           |         |
| $\beta_1 S$                                        | 0.00265 |
| $R^2$                                              | 0.5788  |
| <b>Boyd's model</b>                                |         |
| $R^2$                                              | 0.7987  |

**Table S5** SFN adsorption equilibrium parameters in MB-COFs-4 at different temperatures.

| Isotherm models                                                   | Temperature (°C) |            |            |            |
|-------------------------------------------------------------------|------------------|------------|------------|------------|
|                                                                   | 35               | 45         | 55         | 65         |
| <b>Langmuir</b>                                                   |                  |            |            |            |
| $Q_m$ (mg g <sup>-1</sup> )                                       | 14.728           | 15.480     | 16.103     | 15.576     |
| $K_L$ (L mg <sup>-1</sup> )                                       | 0.0415           | 0.0386     | 0.0337     | 0.0353     |
| $R_L$                                                             | 0.004-0.96       | 0.004-0.96 | 0.004-0.96 | 0.004-0.97 |
| $R^2$                                                             | 0.9956           | 0.9995     | 0.9968     | 0.9894     |
| <b>Freundlich</b>                                                 |                  |            |            |            |
| $K_F$ (mg <sup>1-(1/n)</sup> ·L <sup>1/n</sup> ·g <sup>-1</sup> ) | 1.8232           | 1.666      | 1.567      | 1.576      |
| $n$                                                               | 2.426            | 2.260      | 2.193      | 2.220      |
| $R^2$                                                             | 0.9508           | 0.9631     | 0.9778     | 0.9554     |
| <b>Dubinin-Rabushkevich</b>                                       |                  |            |            |            |
| $Q_m$ (mg g <sup>-1</sup> )                                       | 10.796           | 10.993     | 10.958     | 10.933     |
| $B_D$ (mol <sup>2</sup> kJ <sup>-2</sup> )                        | 14.187           | 13.747     | 13.567     | 14.001     |
| $E$ (kJ mol <sup>-1</sup> )                                       | 0.188            | 0.191      | 0.192      | 0.189      |
| $R^2$                                                             | 0.9209           | 0.8992     | 0.8879     | 0.9059     |
| <b>Temkin</b>                                                     |                  |            |            |            |

|                                               |        |        |        |        |
|-----------------------------------------------|--------|--------|--------|--------|
| $K_T$ (L mg <sup>-1</sup> )                   | 0.435  | 0.370  | 0.331  | 0.339  |
| $b_T$ (kJ mol <sup>-1</sup> L <sup>-1</sup> ) | 0.817  | 0.775  | 0.773  | 0.816  |
| $R^2$                                         | 0.9907 | 0.9962 | 0.9979 | 0.9853 |
| <b>Redlich-Peterson</b>                       |        |        |        |        |
| $a_R$ (mg L <sup>-1</sup> )                   | 0.584  | 0.600  | 0.638  | 0.634  |
| $g$                                           | 0.588  | 0.558  | 0.544  | 0.550  |
| $R^2$                                         | 0.9752 | 0.9764 | 0.9843 | 0.9696 |

**Table S6** SFN content in MB-COFs-4 in fresh cruciferous vegetables.

| Sample              | SFN content(mg/kg FW) |
|---------------------|-----------------------|
| Cauliflower         | 0.49                  |
| Brassica campestris | 0.09                  |
| Chinese cabbage     | 0.40                  |
| Carrot              | 0.01                  |
| Cabbage             | 3.84                  |
| Green turnip        | 6.10                  |
| White radish        | 3.88                  |
| Red radish          | 9.30                  |
| Pakchoi             | 0.35                  |
| Broccoli            | 36.78                 |

### The models for adsorption kinetics

To explore the kinetic behavior between MB-COFs and SFN, several kinetic models, including the pseudo-first-order (1), pseudo-second-order (2), and Ritchie-second-order (3), Webber-Morris's intra-particle diffusion (4), liquid-film diffusion (5), Elovich (6), Frusawa and Smith (F&S) (7), Mathews and Weber (M&W) (8) and Boyd's (9)[1] models were used to fit experimental data. The expressions of the kinetic models are as follows[2-7]:

$$\ln(Q_e - Q_t) = \ln Q_e - k_1 t \quad (S1)$$

$$\frac{t}{Q_t} = \frac{1}{Q_e^2} k_2^{-1} + \frac{t}{Q_e} \quad (S2)$$

$$\frac{1}{Q_t} = \frac{1}{K_r Q_e t} + \frac{1}{Q_e} \quad (S3)$$

$$Q_t = K_i t^{0.5} + C \quad (S4)$$

$$\ln\left(1 - \frac{Q_t}{Q_e}\right) = -k_j t + A \quad (S5)$$

$$Q_t = \frac{1}{\beta} \ln(\alpha\beta) + \frac{1}{\beta} \ln t \quad (S6)$$

$$\ln \left( \frac{C_t}{C_0} - \frac{1}{1 + mK_L} \right) = \ln \frac{mK_L}{1 + mK_L} - \frac{1 + mK_L}{mK_L} \beta_1 St \quad (S7)$$

$$\ln \frac{C_t}{C_0} = -\beta_1 St \quad (S8)$$

$$B_t = -\ln \frac{\pi^2}{6} - \ln \left( 1 - \frac{Q_t}{Q_e} \right) \quad \text{for } \frac{Q_t}{Q_e} > 0.85 \quad (S9-1)$$

$$B_t = \left( \pi^{0.5} - \left( \pi - \frac{\pi^2}{3} \frac{Q_t}{Q_e} \right)^{0.5} \right)^2 \quad \text{for } \frac{Q_t}{Q_e} \leq 0.85 \quad (S9-2)$$

where  $Q_t$  and  $Q_e$  (mg/g) are the adsorption capacities of SFN at time  $t$  and at equilibrium, respectively;  $t$  (min) is the adsorption time.  $\alpha$  and  $\beta$  are the initial rate constant (mg·g<sup>-1</sup>·min<sup>-1</sup>) and desorption constant (g mg<sup>-1</sup>) in Elovich model, respectively.  $k_1$  (min<sup>-1</sup>),  $k_2$  (g mg<sup>-1</sup> min<sup>-1</sup>),  $k_i$  (mg g<sup>-1</sup> min<sup>-0.5</sup>),  $k_j$  (min<sup>-1</sup>),  $k_r$  (min<sup>-1</sup>) and are the rate constants of these models.  $C_0$  and  $C_t$  (mg/L) are the SFN concentrations at the initial and time  $t$ , respectively,  $m$  (g/L) is the mass of adsorbent per unit volume of particle free SFN solution,  $K_L$  (L/mg) is the Langmuir constant (obtained from Langmuir isotherm model),  $\beta_1$  (cm/s) is the mass transfer coefficient and  $S$  is the outer surface of adsorbent per unit volume of particle free slurry (cm<sup>-1</sup>). In general, the value of  $S$  is difficult to determine. Thus, the  $\beta_1 S$  value was used to describe the adsorption process[4]. Boyd's plot was established by plotting the Boyd's function ( $B_t$ ) against time( $t$ ), which is used to identify whether external transport controls the rate of adsorption.

### The models for adsorption isotherm

To further investigate the adsorption isotherm of SFN by MB-COFs-4, Langmuir (10) [6], Freundlich (11) [6], Dubinin-Rabushkevich (D-R) (12) [8], Temkin (13) [8], and Redlich-Peterson (R-P) (14)[9] models were used to fit the experimental data. Among these models, the Langmuir model assumes that the process involves monolayer adsorption on homogenous sites with uniform energy levels within the adsorbent surface, while the Freundlich model assumes that the process is multilayer adsorption and occurs on the heterogeneous surface with a non-uniform energy level. The hybrid

R-P model combines the Freundlich and Langmuir models and may be used in both heterogeneous and homogeneous environments. The Temkin isotherm model has been developed taking into account the chemisorption between the adsorbate and adsorbent, which assumes that the adsorption heat of all the molecules in the layer reduces linearly with the increasing coverage owing to adsorbate-adsorbent interactions. The D-R isotherm assumes that the characteristics of the adsorption curves are related to porosity of the adsorbents and is utilized to determine whether the adsorption process is physical or chemical [8,10-12]. The linear equations of these models are as follows:

$$\frac{C_e}{Q_e} = \frac{1}{Q_m K_L} + \frac{C_e}{Q_m} \quad (S10)$$

$$\ln Q_e = \ln K_F + \frac{1}{n} \ln C_e \quad (S11)$$

$$\ln Q_e = \ln Q_m - B_D \left( RT \ln \left( 1 + \frac{1}{C_e} \right) \right)^2 \quad (S12)$$

$$Q_e = \frac{RT}{b_T} \ln C_e + \frac{RT}{b_T} \ln K_T \quad (S13)$$

$$\ln \left( \frac{C_e}{Q_e} \right) = g \ln C_e + \ln a_R \quad (S14)$$

where  $C_e$  (mg/L) represents the SFN concentrations at equilibrium,  $Q_e$  and  $Q_m$  (mg/g) represent the equilibrium and maximum adsorption amount of SFN.  $K_L$  (L/mg) and  $K_F$  ( $\text{mg}^{1-(1/n)} \cdot \text{L}^{1/n} \cdot \text{g}^{-1}$ ) represent the Langmuir and Freundlich adsorption constants, respectively. The separation factor ( $R_L$ , equal to  $1/(1+C_0 K_L)$ ) for Langmuir model is used to determine whether an adsorption system is favorable or unfavorable.  $0 < R_L < 1$ ,  $R_L > 1$ ,  $R_L = 1$ , and  $R_L = 0$  characterizes a favorable, unfavourable, linear and irreversible adsorption, respectively[4].  $1/n$  expresses a constant related to the surface heterogeneity and indicates different types of isotherms:  $1/n = 0$  means the adsorption is irreversible,  $0 < 1/n < 1$  means the favorable adsorption, and  $1/n > 1$  means the opposite.  $B_D$  ( $\text{mol}^2 \text{kJ}^{-2}$ ) is related to mean free energy  $E$  ( $\text{kJ mol}^{-1}$ ) of the transfer of 1 mol of solute from infinity to the surface of adsorbent, with  $E = 1/(2B_D)^{0.5}$ .  $K_T$  (L/mg) and  $b_T$  ( $\text{kJ mol}^{-1}$ ) is equilibrium binding constant and the Temkin isotherm constant, respectively.  $a_R$  ( $\text{mg L}^{-1}$ ) and  $g$  (dimensionless) are the R-P constants and the value of  $g$  must range between 0 and 1.  $T$  (K) is temperature and  $R$  ( $8.314 \times 10^{-3} \text{ kJ mol}^{-1} \text{ K}^{-1}$ ) is gas constant.



## References

1. Almeida, A.C.M.; do Nascimento, R.A.; Amador, I.C.B.; Santos, T.C.d.S.; Martelli, M.C.; de Faria, L.J.G.; Ribeiro, N.F.d.P. Chemically activated red mud: assessing structural modifications and optimizing adsorption properties for hexavalent chromium. *Colloids and Surfaces A: Physicochemical and Engineering Aspects* **2021**, *628*, doi:10.1016/j.colsurfa.2021.127325.
2. Schwaab, M.; Steffani, E.; Barbosa-Coutinho, E.; Severo, J.B. Critical analysis of adsorption/diffusion modelling as a function of time square root. *Chemical Engineering Science* **2017**, *173*, 179-186, doi:10.1016/j.ces.2017.07.037.
3. Ozer, A.; Akkaya, G.; Turabik, M. The biosorption of Acid Red 337 and Acid Blue 324 on *Enteromorpha prolifera*: The application of nonlinear regression analysis to dye biosorption. *Chemical Engineering Journal* **2005**, *112*, 181-190, doi:10.1016/j.cej.2005.07.007.
4. Fu, D.; Zhang, Y.H.; Lv, F.Z.; Chu, P.K.; Shang, J.W. Removal of organic materials from TNT red water by Bamboo Charcoal adsorption. *Chemical Engineering Journal* **2012**, *193*, 39-49, doi:10.1016/j.cej.2012.03.039.
5. Wang, Q.; Zhao, Y.; Shi, Z.; Sun, X.; Bu, T.; Zhang, C.; Mao, Z.; Li, X.; Wang, L. Magnetic amino-functionalized-MOF(M = Fe, Ti, Zr)@COFs with superior biocompatibility: Performance and mechanism on adsorption of azo dyes in soft drinks. *Chemical Engineering Journal* **2021**, *420*, doi:10.1016/j.cej.2021.129955.
6. Qin, P.; Chen, D.; Li, D.; Li, M.; Mu, M.; Gao, Y.; Zhu, S.; Lu, M. Synthesis of spindle-like amino-modified Zn/Fe bimetallic metal-organic frameworks as sorbents for dispersive solid-phase extraction and preconcentration of phytohormones in vegetable samples. *Food Chem* **2023**, *409*, 135272, doi:10.1016/j.foodchem.2022.135272.
7. Lima, J.Z.; Ferreira da Silva, E.; Patinha, C.; Duraes, N.; Vieira, E.M.; Rodrigues, V.G.S. Sorption of arsenic by composts and biochars derived from the organic fraction of municipal solid wastes: Kinetic, isotherm and oral bioaccessibility study. *Environ Res* **2022**, *204*, 111988, doi:10.1016/j.envres.2021.111988.
8. Barkakati, P.; Begum, A.; Das, M.L.; Rao, P.G. Adsorptive separation of Ginsenoside from aqueous solution by polymeric resins: Equilibrium, kinetic and thermodynamic studies. *Chemical Engineering Journal* **2010**, *161*, 34-45, doi:10.1016/j.cej.2010.04.018.
9. Hassan, R.; Abo Eldahab, H.M.M.; Shehata, F.A.; El-Reefy, S.A.; Mohamed, S.A. Proficiency of some synthetic alginate derivatives for sequestration of Iodine-131 from radioactive liquid waste. *Environ Technol* **2023**, 1-14, doi:10.1080/09593330.2023.2213447.
10. Zhao, J.; Dai, Y. Tetracycline adsorption mechanisms by NaOH-modified biochar derived from waste *Auricularia auricula* dregs. *Environ Sci Pollut Res Int* **2022**, *29*, 9142-9152, doi:10.1007/s11356-021-16329-5.
11. de Oliveira, C.; Renda, C.G.; Moreira, A.J.; Pereira, O.A.P.; Pereira, E.C.; Freschi, G.P.G.; Bertholdo, R. Evaluation of a graphitic porous carbon modified with iron oxides for atrazine environmental remediation in water by adsorption. *Environ Res* **2023**, *219*, 115054, doi:10.1016/j.envres.2022.115054.
12. ZA, A.L.; Badjah, A.Y.; Alharbi, O.M.L.; Ali, I. Copper carboxymethyl cellulose nanoparticles for efficient removal of tetracycline antibiotics in water. *Environ Sci Pollut Res Int* **2020**, *27*, 42960-42968, doi:10.1007/s11356-020-10189-1.
